# Supplementary material for: Compartmentation of cGMP Signaling in Induced Pluripotent Stem Cell Derived Cardiomyocytes during Prolonged Culture
Source: MDPI journal article supplement (doi:10.3390/cells11203257), 2022-10-17
Supplement: s1 [file s1]

Table S1. Primers used on cDNA IMR90 iPS-CMs aged day 30 and day 90.

| <b>mRNA</b>                                             | <b>Primer Sequence</b>                                                    |
|---------------------------------------------------------|---------------------------------------------------------------------------|
| Phosphodiesterase 1A (PDE1A)                            | <i>Fwd:</i> TTGGCTTCTACCTTTACACGGA<br><i>Rev:</i> AGGGCAAATACATCGAAAGACC  |
| Phosphodiesterase 1B (PDE1B)                            | <i>Fwd:</i> ATGAGACACGGCAAATCTTGG<br><i>Rev:</i> TGCACAATGCTTCGGAACCTG    |
| Phosphodiesterase 1C (PDE1C)                            | <i>Fwd:</i> GATGTGGACAAGTGGTCCTTTG<br><i>Rev:</i> GGGGATCTTGAAACGGCTGA    |
| Phosphodiesterase 2A (PDE2A)                            | <i>Fwd:</i> CCTCCTGTGACCTCTCTGAC-C<br><i>Rev:</i> TGAACCTTGTGGGACACCTT-GG |
| Phosphodiesterase 3A (PDE3A)                            | <i>Fwd:</i> TCACAGGGCCTTAACTTTAC-AC<br><i>Rev:</i> GGAGCAAGAATTGGTTTGT-CC |
| Phosphodiesterase 3B (PDE3B)                            | <i>Fwd:</i> CCTCAGGCAGTTTATACA-ATG<br><i>Rev:</i> TGCTTCTTCATCTCCCTGCT-C  |
| Natriuretic Peptide Receptor 1 (NPR1)                   | <i>Fwd:</i> CTTCGGTGTCAAGGACGAGTA<br><i>Rev:</i> GGTAGGCGTAGAGCATGAGC     |
| Natriuretic Peptide Receptor 2 (NPR2)                   | <i>Fwd:</i> TGACCCCGACCTGCTGTTA<br><i>Rev:</i> CGAACCAGGGTACGATAATGG      |
| $\beta_3$ -adrenergic receptor (ADRB3)                  | <i>Fwd:</i> GACCAACGTGTTTCGTGACTTC<br><i>Rev:</i> GCACAGGGTTTCGATGCTG     |
| Human glyceraldehyde 3-phosphate dehydrogenase (hGAPDH) | <i>Fwd:</i> AATCCCATCACCATCTTCCA<br><i>Rev:</i> TGGACTCCACGACGTACTCA      |

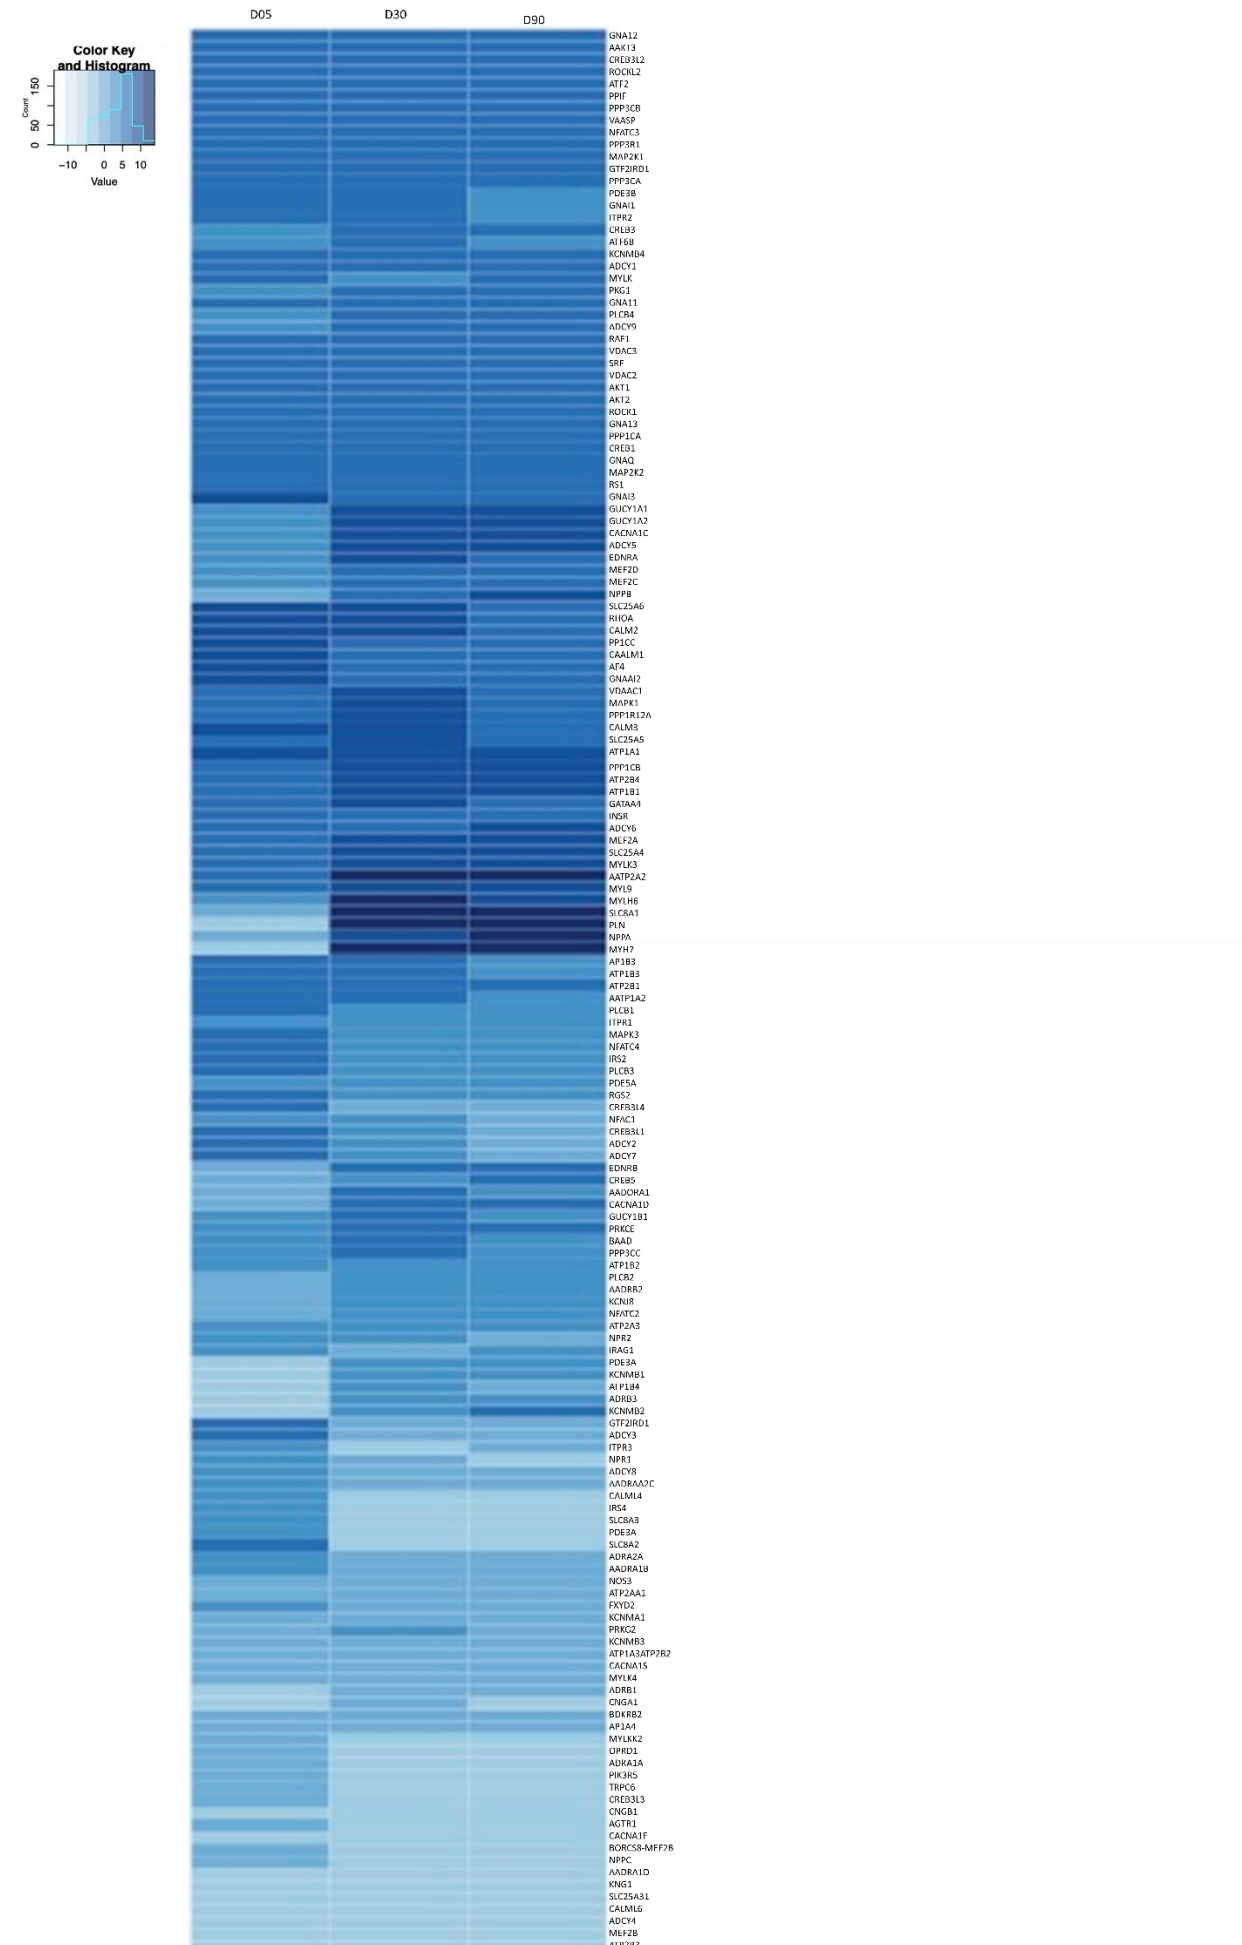

Figure S1. Heatmap of gene expression of genes involved in the cGMP-PKG pathway in induced pluripotent stem cell cardiomyocytes (iPS-CM) as they were cultured for 5, 30 and 90 days.

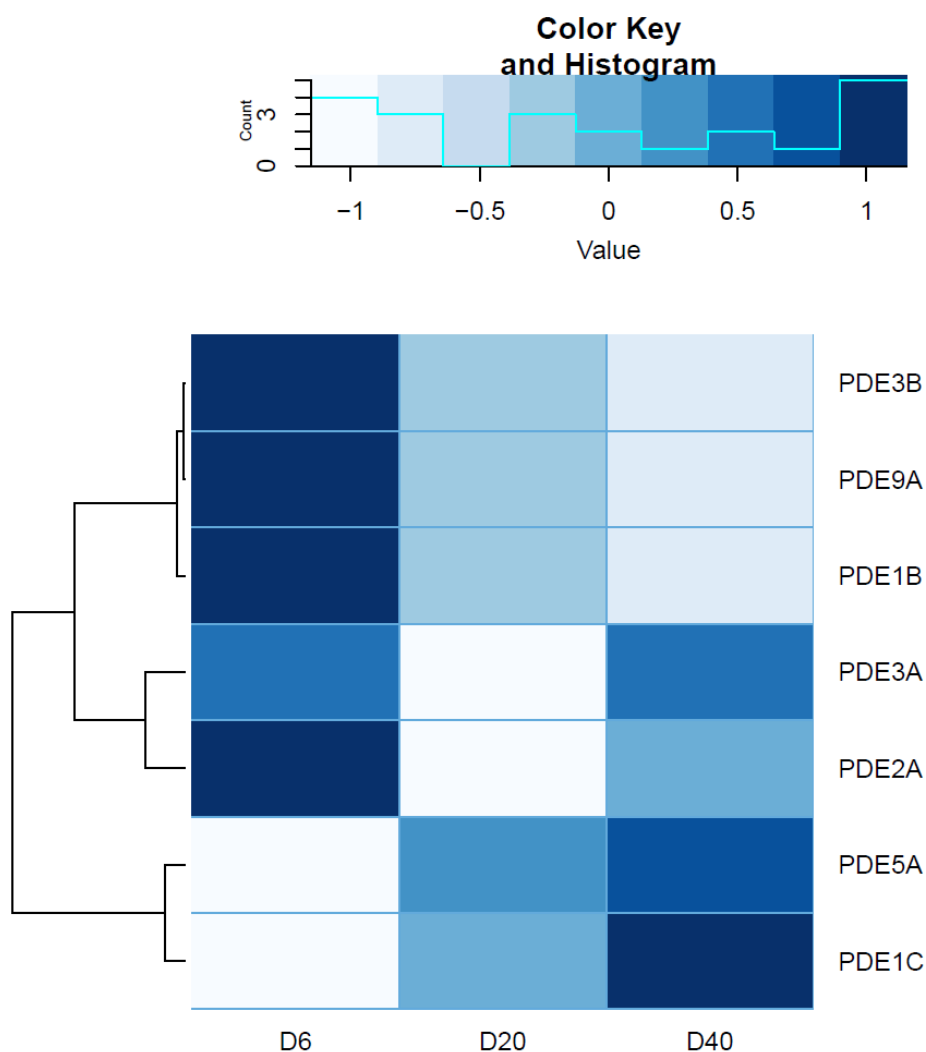

Figure S2. Expression of various PDEs in H9 hiPS-CMs as revealed by RNA-seq.

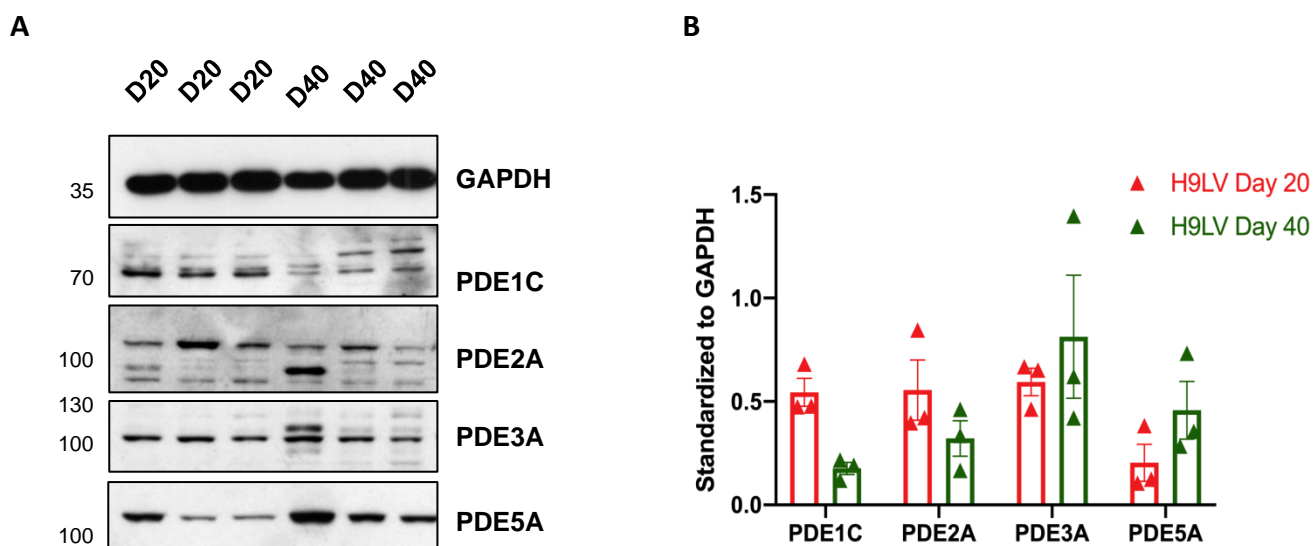

Figure S3. Expression of various PDEs in H9 hiPS-CMs at early and late stage in culture. A. Western blot of PDEs at Day 20 and Day 40 in culture; B. Quantification band density of blots in A.

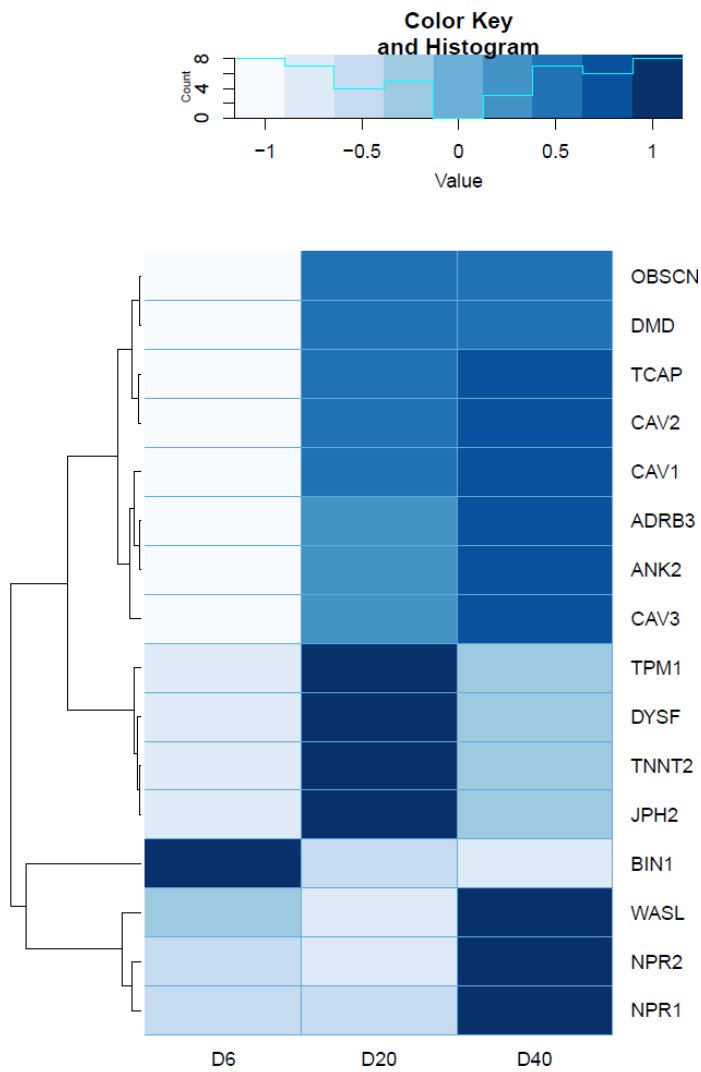

Figure S4. Expression of genes relevant to myocyte maturation in H9 iPS-CMs as revealed by RNA-seq.

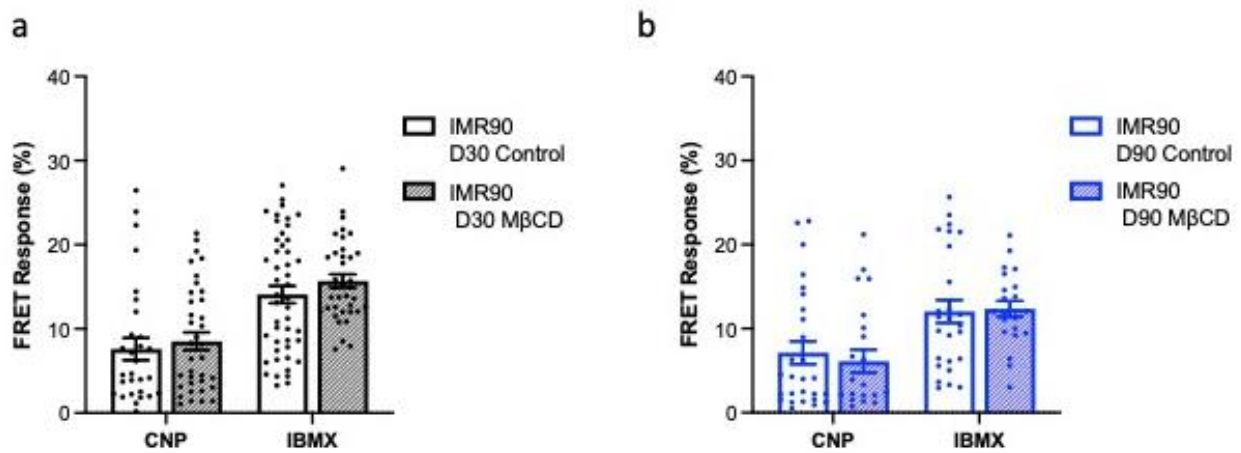

Figure S5. cGMP levels in control and caveolae depleted (MβCD) IMR90 iPS-CMs aged (a) day 30 and (b) day 90 upon C-type peptide (CNP) stimulation and general phosphodiesterase inhibition (IBMX).
